# Supplementary material for: The Rotterdam Elderly Pain Observation Scale (REPOS) is reliable and valid for non-communicative end-of-life patients
Source: Springer Nature journal article supplement (doi:10.1186/s12904-018-0280-x), 2018-02-21
Supplement: MOESM1 [file 15481188]

# Rotterdam Elderly Pain Observation Scale (REPOS)

Please observe for 2 minutes, and tick the box if the specific behavior was present during the observation. Next, summate all ticked behaviors to obtain the REPOS total score.

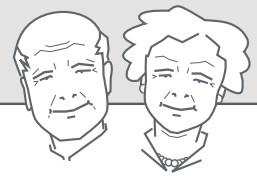

| NAME CLIENT                                                                     | 1st observation          | 2nd observation          | 3rd observation          |
|---------------------------------------------------------------------------------|--------------------------|--------------------------|--------------------------|
| NAME OBSERVER                                                                   |                          |                          |                          |
| DATE/TIME                                                                       |                          |                          |                          |
| SITUATION<br>(ADL, transfer, walking, physical therapy, rest, wound care, e.g.) |                          |                          |                          |
| PAIN MEDICATION<br>(type, dosing and time of last administration)               |                          |                          |                          |
| Tense face                                                                      | <input type="checkbox"/> | <input type="checkbox"/> | <input type="checkbox"/> |
| Eyes (almost) squeezed                                                          | <input type="checkbox"/> | <input type="checkbox"/> | <input type="checkbox"/> |
| Raising upper lip                                                               | <input type="checkbox"/> | <input type="checkbox"/> | <input type="checkbox"/> |
| Grimace                                                                         | <input type="checkbox"/> | <input type="checkbox"/> | <input type="checkbox"/> |
| Frightened, fearful look                                                        | <input type="checkbox"/> | <input type="checkbox"/> | <input type="checkbox"/> |
| Moving body parts                                                               | <input type="checkbox"/> | <input type="checkbox"/> | <input type="checkbox"/> |
| Panicky, panics attack                                                          | <input type="checkbox"/> | <input type="checkbox"/> | <input type="checkbox"/> |
| Moaning / groaning                                                              | <input type="checkbox"/> | <input type="checkbox"/> | <input type="checkbox"/> |
| Sounds of restlessness / verbal expressions                                     | <input type="checkbox"/> | <input type="checkbox"/> | <input type="checkbox"/> |
| Breath holding / faltering respiration                                          | <input type="checkbox"/> | <input type="checkbox"/> | <input type="checkbox"/> |
| <b>REPOS TOTAL SCORE</b>                                                        | <input type="checkbox"/> | <input type="checkbox"/> | <input type="checkbox"/> |

see REPOS decision tree

see REPOS decision tree

see REPOS decision tree
