# Supplementary material for: The Rotterdam Elderly Pain Observation Scale (REPOS) is reliable and valid for non-communicative end-of-life patients
Source: Springer Nature journal article supplement (doi:10.1186/s12904-018-0280-x), 2018-02-21
Supplement: MOESM3 [file 15481188]

# REPOS decision tree

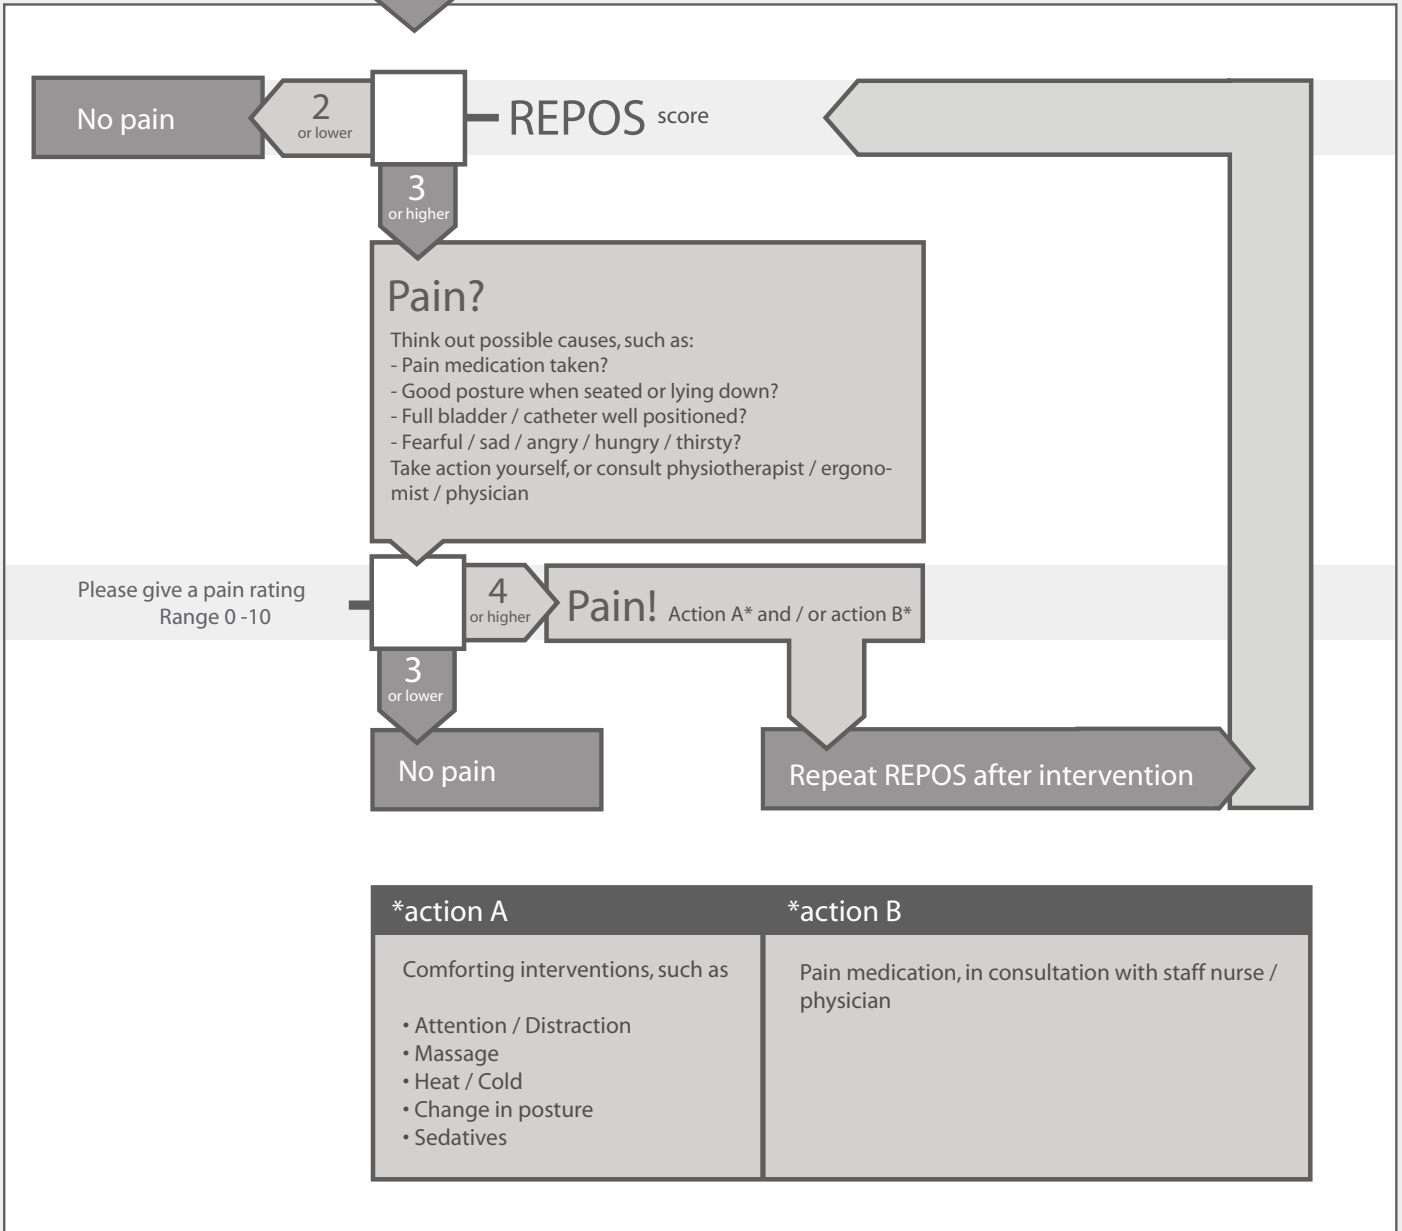

Please enter the REPOS score and pain rating in the schedule below, as well as the action taken. The pain rating ranges from 0 (no pain) to 10 (worst imaginable pain).

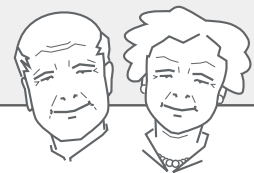

| NAME CLIENT   | 1st observation | 2nd observation | 3rd observation |
|---------------|-----------------|-----------------|-----------------|
| NAME OBSERVER |                 |                 |                 |
| DATE/TIME     |                 |                 |                 |
| REPOS score   |                 |                 |                 |
| PAIN RATING   |                 |                 |                 |
| ACTION        |                 |                 |                 |
